# Supplementary material
Source: PubMed Central journal article supplement (PMC7721992)
Supplement: NIHMS1600512-supplement-SI_1_All_Flatmaps.pdf [file NIHMS1600512-supplement-SI_1_All_Flatmaps.pdf]

## Mouse Brain Flatmap 1.0

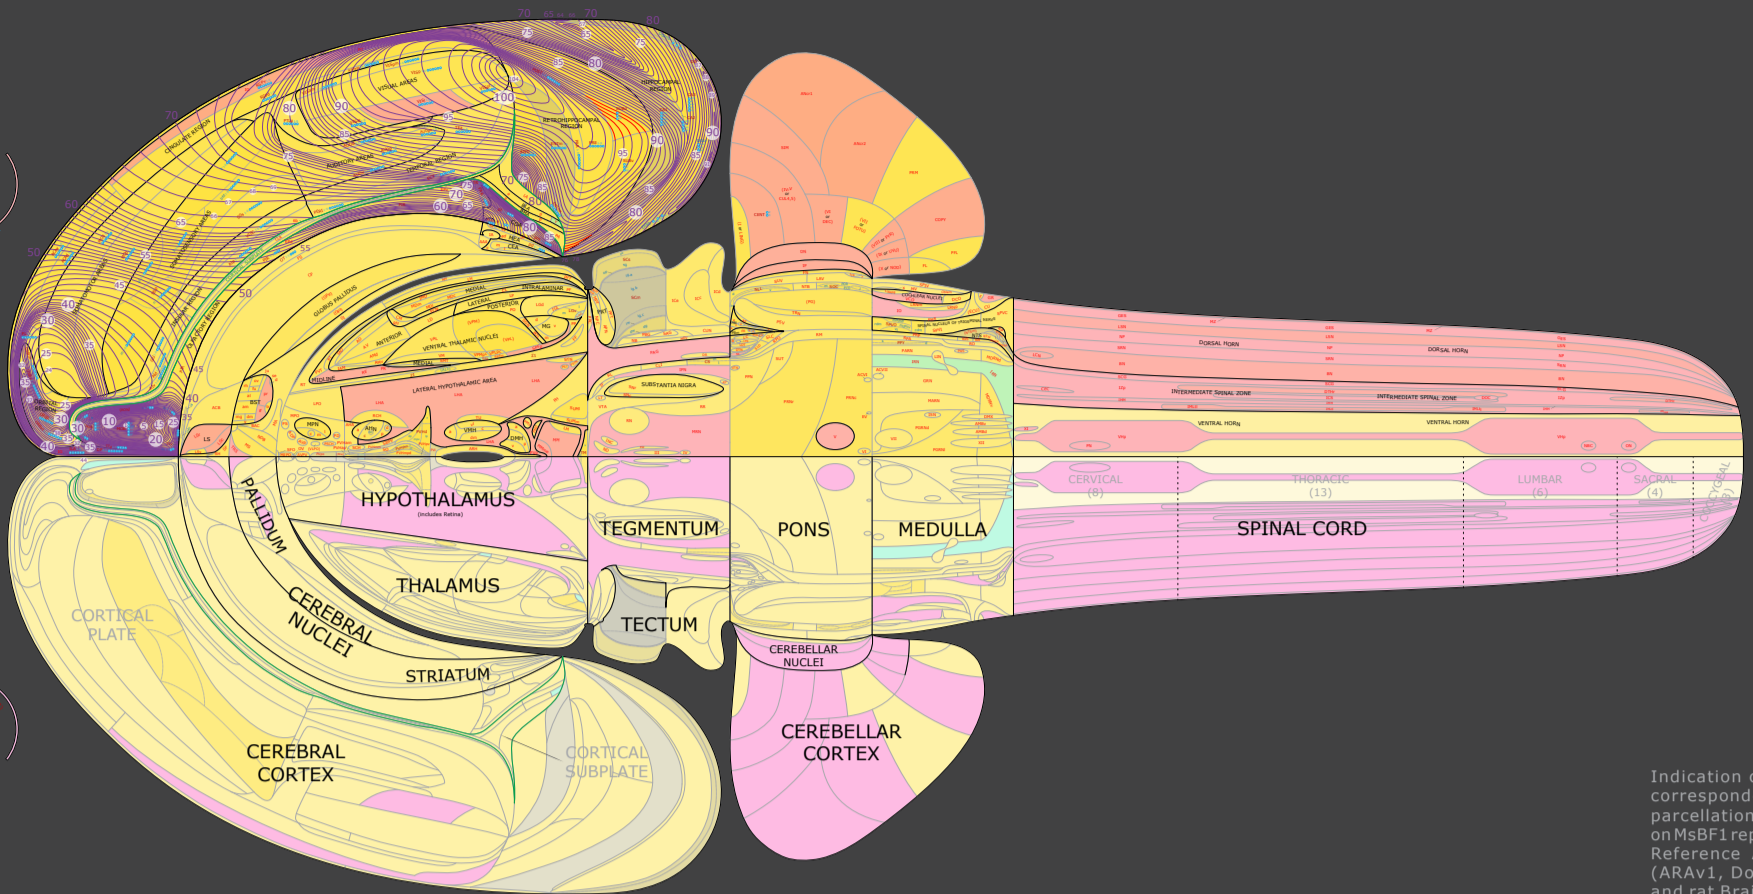

Indication of differences and correspondences of regional parcellation and nomenclature on MsBF1 representing the Allen Reference Atlas version 1.0 (ARAV1, Dong, H.-W., 2007), and rat Brain Maps 3.0 (BM3) (Swanson, L. W., 2004) and 4.0 (BM4) (Swanson, L. W., 2018)

- BM4 correspondence
- BM3 correspondence but BM4 difference
- BM3 and BM4 difference
- No equivalent parcellation in BM3 or BM4

Parenthesized abbreviations indicate a BM4 nomenclature but not parcellation difference

Mouse brain flatmap version 1.0 (MsBF1) (Hahn *et al.*, 2020), based on rat brain flatmap version 4.0 in Brain Maps 4.0 (Swanson, L. W., 2018), and the Allen Reference Atlas version 1.0 (Dong, H.-W., 2007)

## Rat Brain Flatmap 5.0

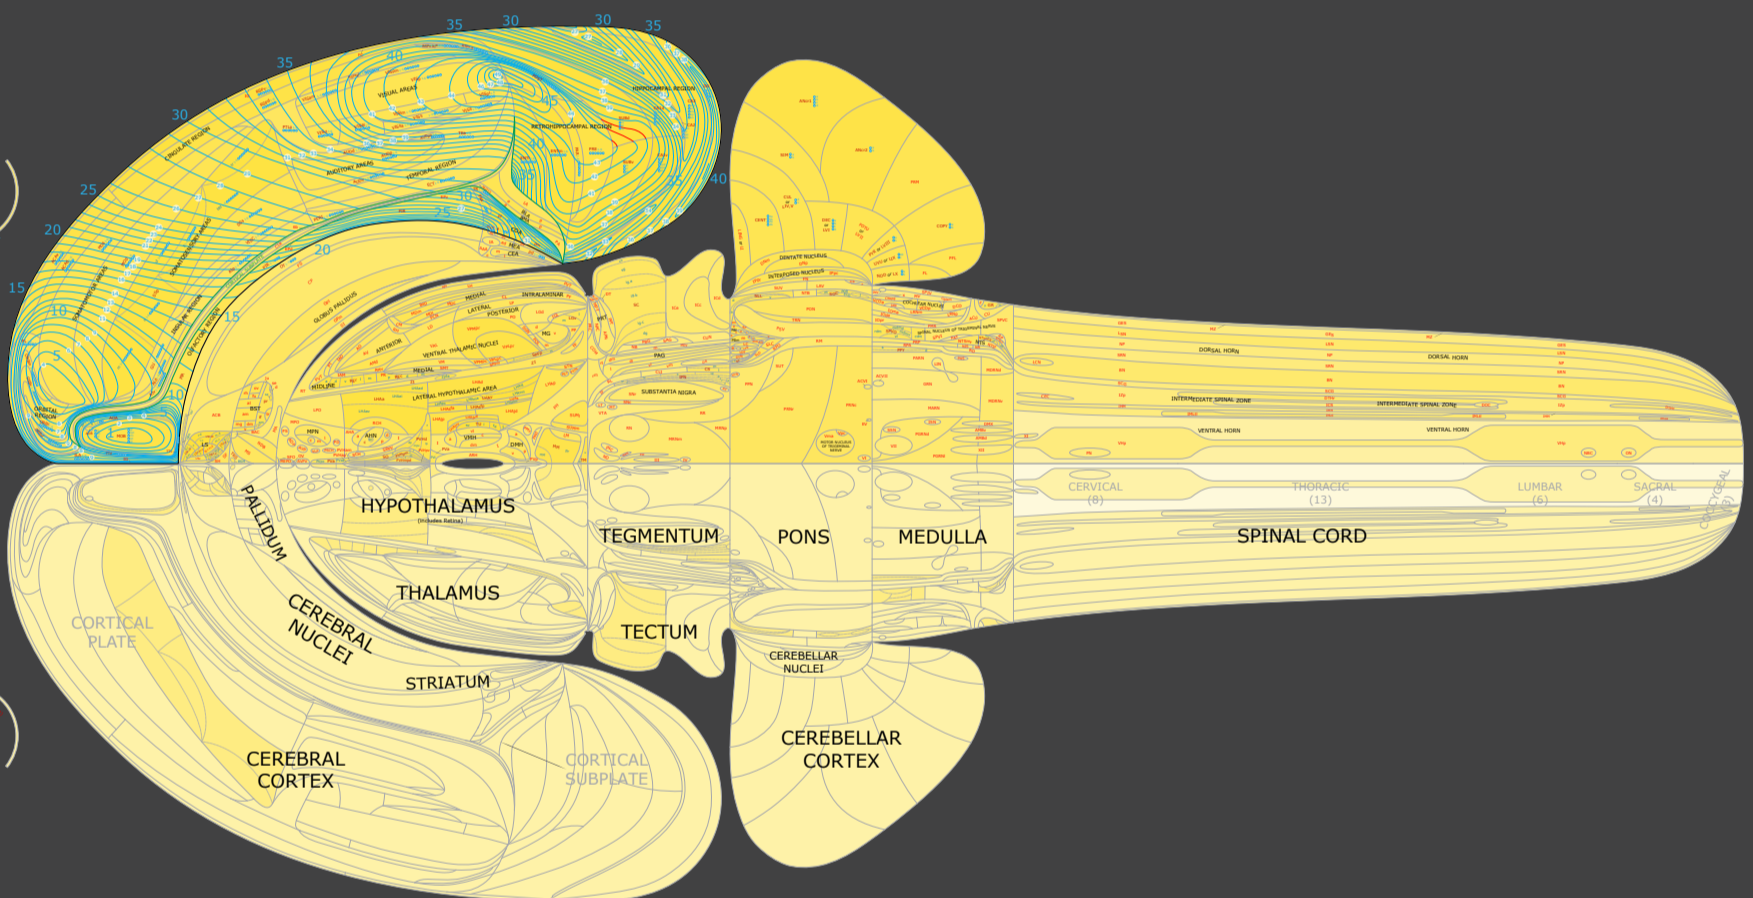

Rat brain flatmap version 5.0 (RtBF5) (Hahn *et al.*, 2020), based on version 4.0 in Brain Maps 4.0 (Swanson, L. W., 2018)

## Human Brain Flatmap 3.0

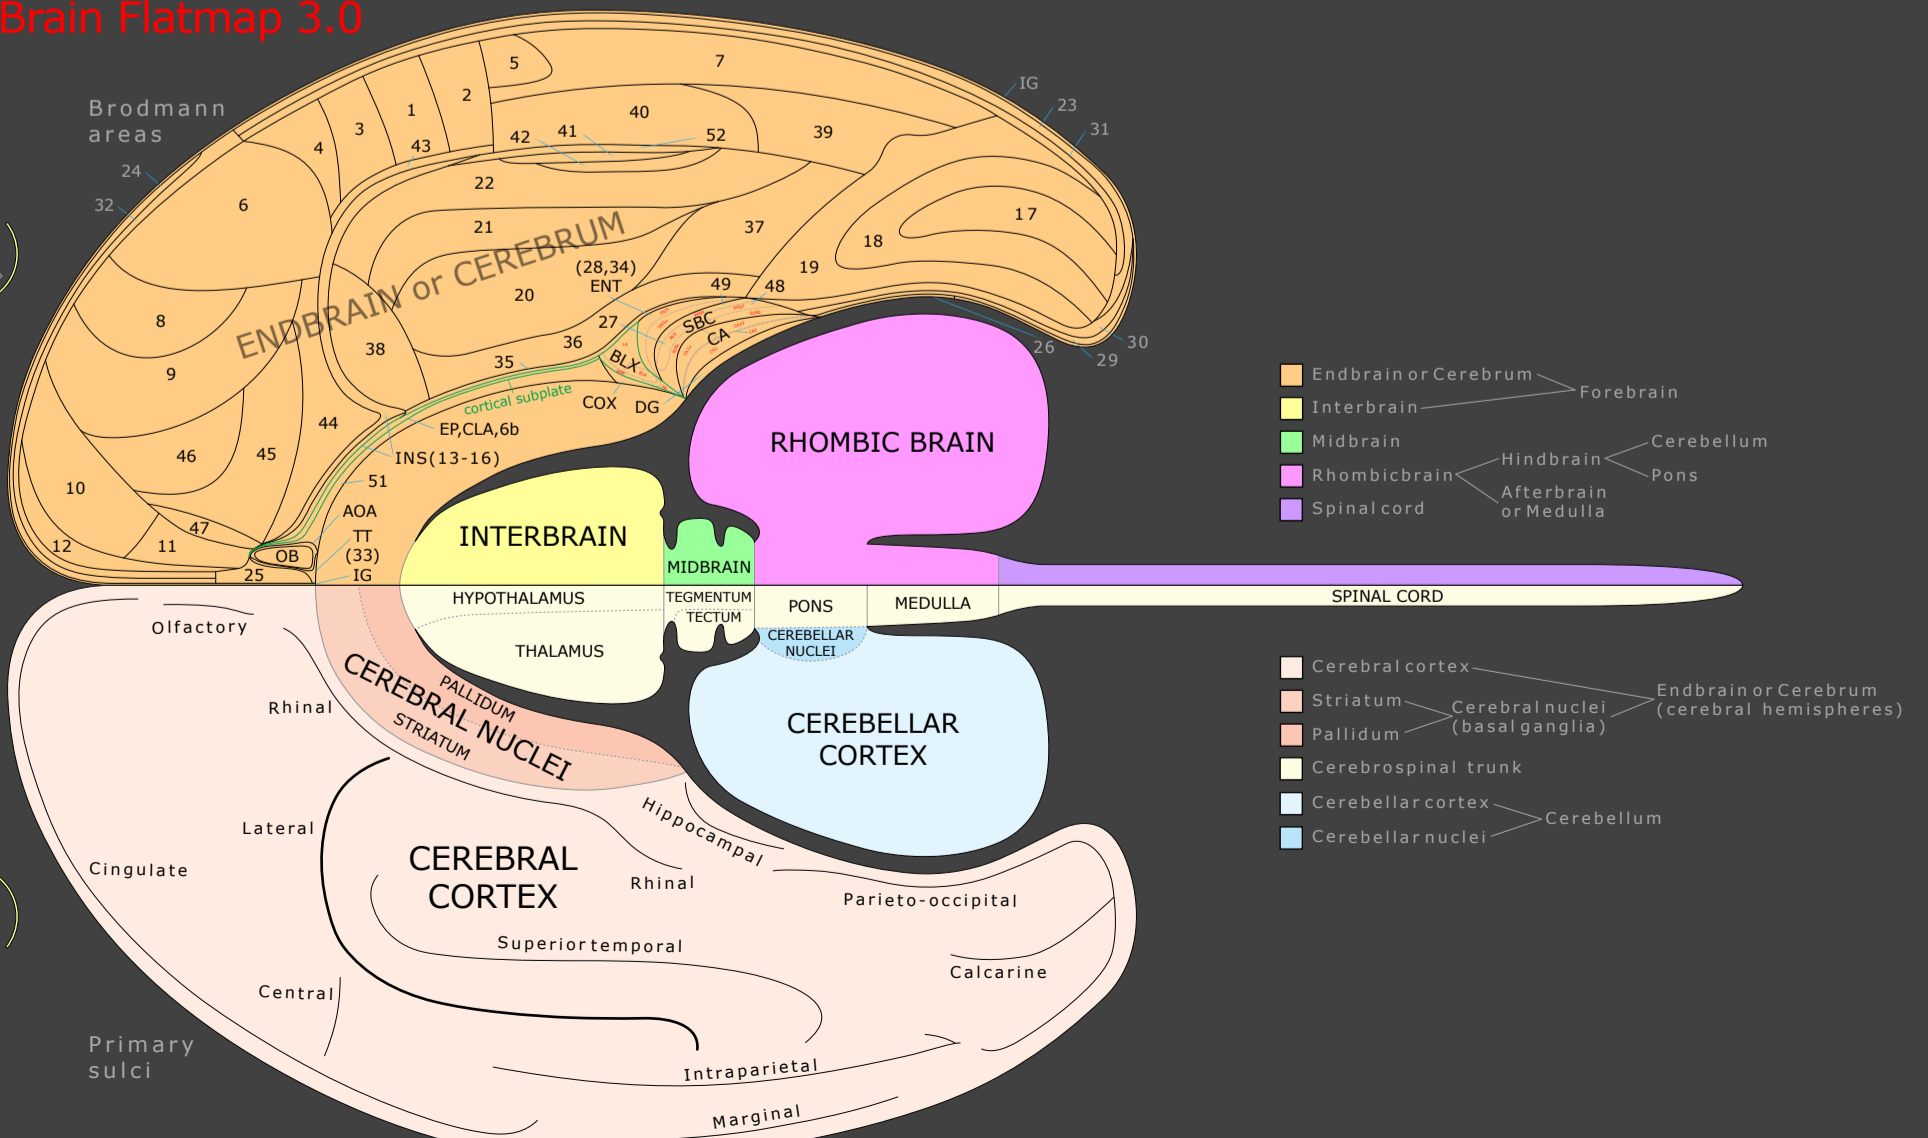

Human brain flatmap version 3.0 (HuBF3) (Hahn *et al.*, 2020), based on version 2.0 in Brain Maps 4.0 (Swanson, L. W., 2018)
