# Supplementary material
Source: PubMed Central journal article supplement (PMC7721992)
Supplement: NIHMS1600512-supplement-SI_2_RtBF5.pdf [file NIHMS1600512-supplement-SI_2_RtBF5.pdf]

# A flatmap atlas summarizing The rat nervous system

## Rat Brain Flatmap 5.0

hide this title page (layer) to view the flatmap diagrams

**This is a layered Portable Document Format (PDF) file. Viewing in Adobe Acrobat software is required for layer functionality (layers may not be viewable with mobile versions of Acrobat, or if the PDF is opened inside a web browser).** Each layer contains graphics and/or text representing different structural features and is named accordingly. A selection of these layers is shown by default. To show or hide layers click on the boxes to the left of the layer names in the layer navigation pane. To show or hide the layer navigation pane, either click on the 3-stacked layers icon, or access it from the menu bar [View > Show/Hide > Navigation Panes > Layers].

This file was published as Supporting Information 2 in Hahn *et al.*, Journal of Comparative Neurology, 2020. To create customized versions of these diagrams using Adobe Illustrator (Ai) software, it is advisable to use the consolidated master PDF file (Supporting Information 1) that retains all the properties of the original Ai file and is supported by an annotated guide to its structure (Supporting Information 4). See the original publication for further details.
