# Supplementary material
Source: PubMed Central journal article supplement (PMC7721992)

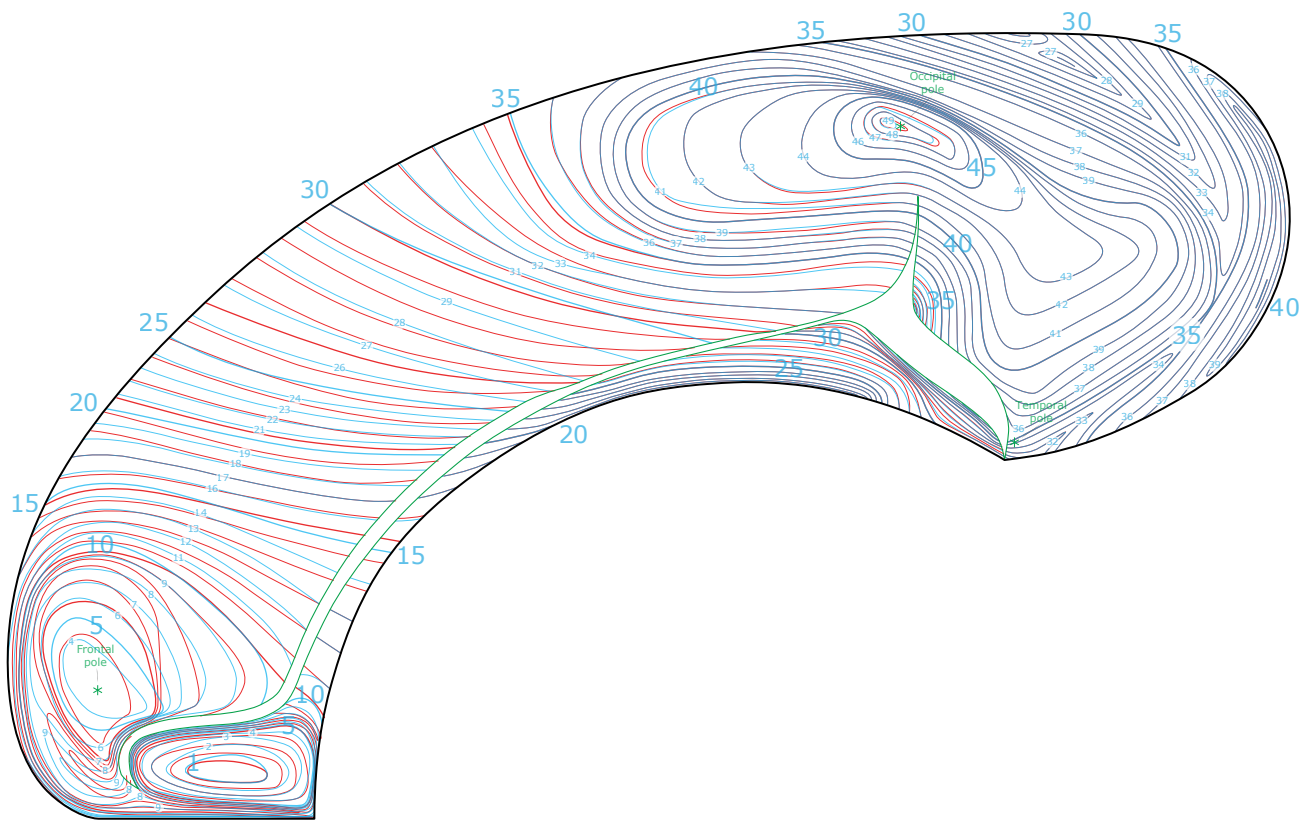

Supplement: NIHMS1600512-supplement-SI_5.pdf [file NIHMS1600512-supplement-SI_5.pdf]
